# Supplementary material for: Constitutive hippocampal cholesterol loss underlies poor cognition in old rodents
Source: PubMed Central journal article supplement (PMC4119354; doi:10.15252/emmm.201303711), 2014-05-30
Supplement: emmm0006-0902-SD1.pdf [file emmm0006-0902-SD1.pdf]

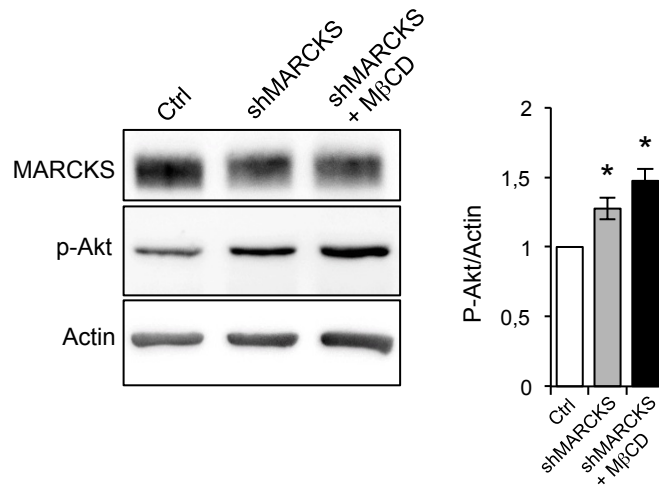

**Supplementary Figure S1. MARCKS knock down results in increased p-Akt levels and cholesterol decrease potentiate this effect.**

p-Akt was measured by Western blot in 15DIV neurons infected with lentiviral particles that express shRNA designed to knock down MARCKS (shMARCKS). MARCKS knock down resulted in increased p-Akt levels compared to controls. Cholesterol extraction from shMARCKS treated neurons (shMARCKS + MβCD) resulted in a further increase of Akt phosphorylation. The amount of p-Akt (relative to untreated controls) were: shMARCKS =  $1.28 \pm 0.054$  and shMARCKS + chol =  $1.47 \pm 0.062$  ( $p = 0.036$ ,  $n = 3$  different cultures).
